# Supplementary material for: Co-regulation of the copper vacancy concentration and point defects leading to the enhanced thermoelectric performance of Cu3In5Te9-based chalcogenides
Source: Royal Society of Chemistry journal article supplement (doi:10.1039/c9ra06565b), 2019-01-01
Supplement: c9ra06565b1.pdf [file c9ra06565b1.pdf]

## Supporting Information

# Co-regulation of the copper vacancy concentration and point defects leading to the enhanced thermoelectric performance of $\text{Cu}_3\text{In}_5\text{Te}_9$ -based chalcogenides

Min Li,<sup>a,b</sup> Yong Luo,<sup>b,\*</sup> Xiaojuan Hu,<sup>c</sup> Zhongkang Han,<sup>c,\*</sup> Xianglian Liu,<sup>a</sup> Jiaolin Cui<sup>a,\*</sup>

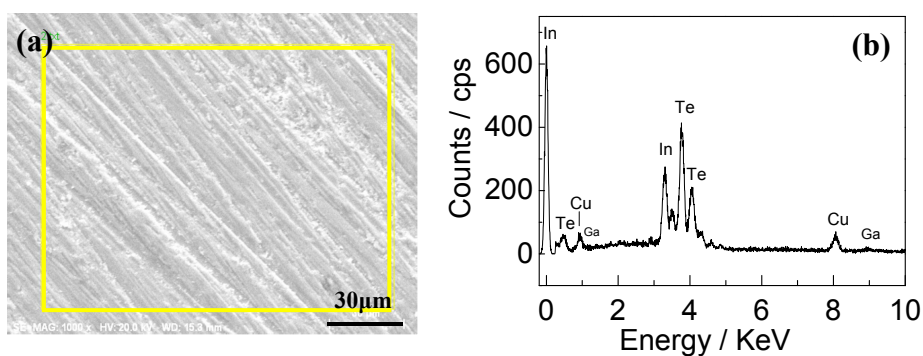

Figure S1 (a) The fracture surface of  $(\text{Cu}_{3+x}\text{In}_{5-x}\text{Ga}_x\text{Te}_9)$  ( $x=0.3$ ); (d) An EDAX pattern.

Table S1 Average molars of four elements identified in  $(\text{Cu}_{3+x}\text{In}_{5-x}\text{Ga}_x\text{Te}_9)$  ( $x=0, 0.3$ ) (taken from three different areas). The error of the compositions are about 5%.

| Compounds | Cu   | In   | Te   | Ga   |
|-----------|------|------|------|------|
| $x=0$     | 2.86 | 5.08 | 9.04 | ---- |
| $x=0.1$   | 2.94 | 5.04 | 9.02 | 0.08 |
| $x=0.3$   | 3.23 | 4.65 | 9.11 | 0.29 |

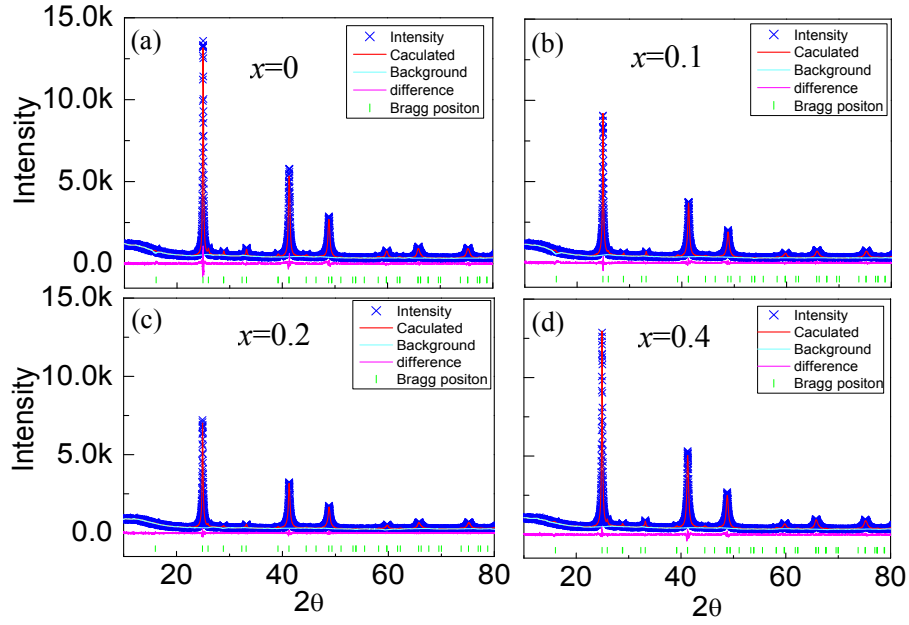

Figure S2 Rietveld refinements using the X-ray diffraction data to the samples  $\text{Cu}_{3+x}\text{In}_{5-x}\text{Ga}_x\text{Te}_9$  ( $x=0, 0.1, 0.2, 0.4$ ).

Table S2 Experimental Parameters of Powder X-ray Diffraction, and Refined Crystallographic Data of  $\text{Cu}_{3+x}\text{In}_{5-x}\text{Ga}_x\text{Te}_9$  ( $x=0$ ).

| Chemical Formula               | $\text{Cu}_3\text{In}_5\text{Te}_9$ |
|--------------------------------|-------------------------------------|
| Space group                    | P4(75)                              |
| $a$ (Å)                        | 8.73854(7)                          |
| $b$ (Å)                        | 8.73854(7)                          |
| $c$ (Å)                        | 7.12986(9)                          |
| $V$ (Å <sup>3</sup> )          | 544.45(10)                          |
| Number of structure parameters | 11                                  |
| Number of profile parameters   | 13                                  |
| $^a R_B$ (%)                   | 4.29                                |
| $^b R_p$ (%)                   | 4.24                                |
| $^c R_{wp}$ (%)                | 5.44                                |
| $^d S$                         | 1.28                                |

$$^a R_B = \frac{\sum |I_{O,h} - I_{C,h}|}{\sum |I_{O,h}|} \quad ^b R_p = \frac{\sum |y_i - y_{C,i}|}{\sum y_i} \quad ^c R_{wp} = \left[ \frac{\sum w_i |y_i - Y_{C,i}|^2}{\sum w_i y_i^2} \right]^{\frac{1}{2}} \quad ^d S = R_{wp} / R_{exp}$$

Table S3 Experimental Parameters of Powder X-ray Diffraction, and Refined Crystallographic Data of  $\text{Cu}_{3+x}\text{In}_{5-x}\text{Ga}_x\text{Te}_9$  ( $x=0.1$ ).

| Chemical Formula               | $\text{Cu}_{3.1}\text{In}_{4.9}\text{Ga}_{0.1}\text{Te}_9$ |
|--------------------------------|------------------------------------------------------------|
| Space group                    | P4(75)                                                     |
| $a$ (Å)                        | 8.73052(8)                                                 |
| $b$ (Å)                        | 8.73052(8)                                                 |
| $c$ (Å)                        | 7.10306(7)                                                 |
| $V$ (Å <sup>3</sup> )          | 541.41(5)                                                  |
| Number of structure parameters | 12                                                         |
| Number of profile parameters   | 19                                                         |
| $^a R_B$ (%)                   | 4.43                                                       |
| $^b R_p$ (%)                   | 4.46                                                       |
| $^c R_{wp}$ (%)                | 5.57                                                       |
| $^d S$                         | 1.25                                                       |

Table S4 Experimental Parameters of Powder X-ray Diffraction, and Refined Crystallographic Data of  $\text{Cu}_{3+x}\text{In}_{5-x}\text{Ga}_x\text{Te}_9$  ( $x=0.2$ ).

| Chemical Formula               | $\text{Cu}_{3.2}\text{In}_{4.8}\text{Ga}_{0.2}\text{Te}_9$ |
|--------------------------------|------------------------------------------------------------|
| Space group                    | P4(75)                                                     |
| $a$ (Å)                        | 8.71896(5)                                                 |
| $b$ (Å)                        | 8.71896(5)                                                 |
| $c$ (Å)                        | 7.09668(7)                                                 |
| $V$ (Å <sup>3</sup> )          | 539.49(9)                                                  |
| Number of structure parameters | 13                                                         |
| Number of profile parameters   | 29                                                         |
| $^a R_B$ (%)                   | 4.69                                                       |
| $^b R_p$ (%)                   | 4.90                                                       |
| $^c R_{wp}$ (%)                | 6.00                                                       |
| $^d S$                         | 1.23                                                       |

Table S5 Experimental Parameters of Powder X-ray Diffraction, and Refined Crystallographic Data of  $\text{Cu}_{3+x}\text{In}_{5-x}\text{Ga}_x\text{Te}_9$  ( $x=0.4$ ).

| Chemical Formula               | $\text{Cu}_{3.4}\text{In}_{4.6}\text{Ga}_{0.4}\text{Te}_9$ |
|--------------------------------|------------------------------------------------------------|
| Space group                    | P4(75)                                                     |
| $a$ (Å)                        | 8.690(6)                                                   |
| $b$ (Å)                        | 8.690(6)                                                   |
| $c$ (Å)                        | 7.05(3)                                                    |
| $V$ (Å <sup>3</sup> )          | 532.38(15)                                                 |
| Number of structure parameters | 13                                                         |
| Number of profile parameters   | 29                                                         |
| $^a R_B$ (%)                   | 4.37                                                       |
| $^b R_p$ (%)                   | 4.20                                                       |
| $^c R_{wp}$ (%)                | 5.53                                                       |
| $^d S$                         | 1.31                                                       |

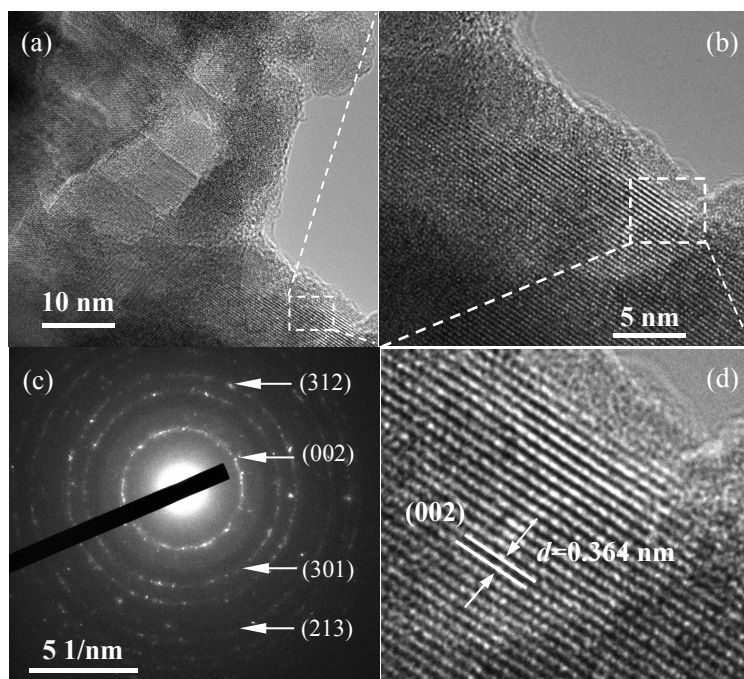

Figure S3 Microstructures of the intrinsic  $\text{Cu}_3\text{In}_5\text{Te}_9$  powder sample ( $V_c=0.11$ ,  $x=0$ ). (a) TEM image; (b) Zoomed view in (a); (c) Corresponding selected area electron diffraction (SAED) pattern; (d) Magnified image of (b).

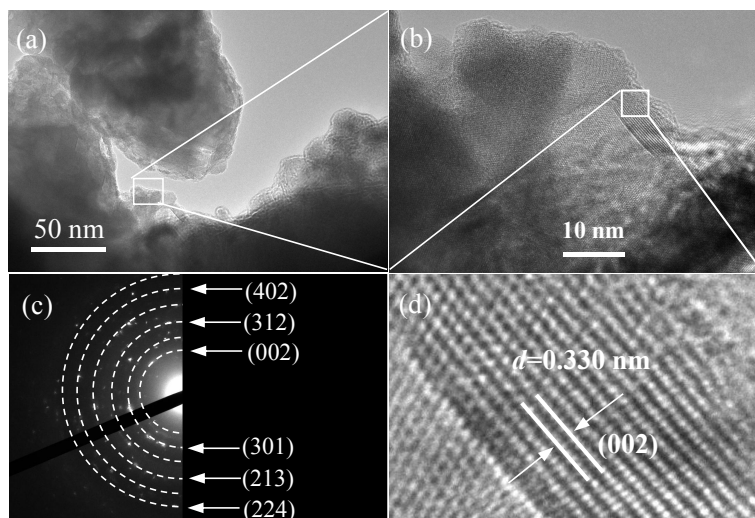

Figure S4 Microstructures of the  $\text{Cu}_{3+x}\text{In}_{5+x}\text{Ga}_x\text{Te}_9$  powder sample ( $V_c=0.078$ ,  $x=0.3$ ). (a) TEM image; (b) Zoomed view in (a); (c) Corresponding selected area electron diffraction (SAED) pattern; (d) Magnified image of (b).

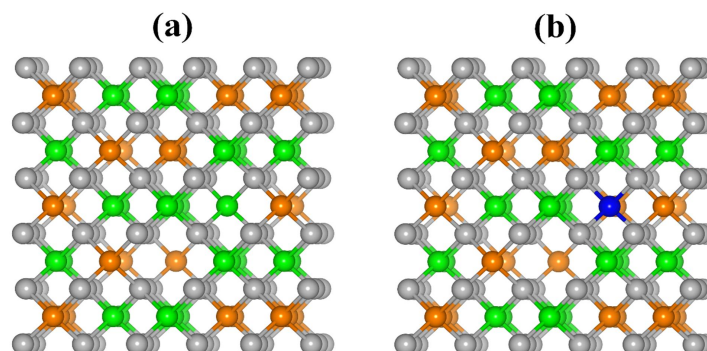

Figure S5 Crystal structures of (a)  $\text{Cu}_{10}\text{In}_{17}\text{Te}_{32}$  and (b)  $\text{Cu}_{11}\text{In}_{16}\text{GaTe}_{32}$ . Cu, In, Te, and Ga are in yellow, green, grey, and blue, respectively.

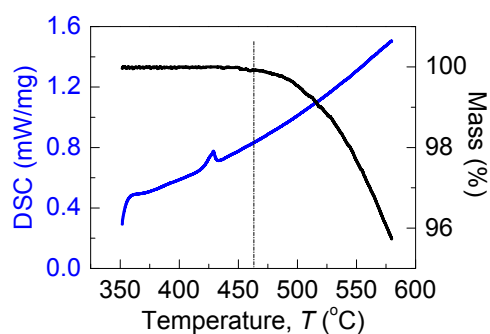

Figure S6 TGA/DSC data for  $\text{Cu}_3\text{In}_5\text{Te}_9$ , with exothermic effect at  $\sim 427$  °C, at which an order-disorder transition might occur.
